# Supplementary material for: Reversal of the Upward Trend of Obesity in Boys, but Not in Girls, in Spain
Source: MDPI journal article supplement (doi:10.3390/ijerph18041842), 2021-02-14

Figure S1. Mean body mass index in boys aged 5 to 9 and 10 to 15 years

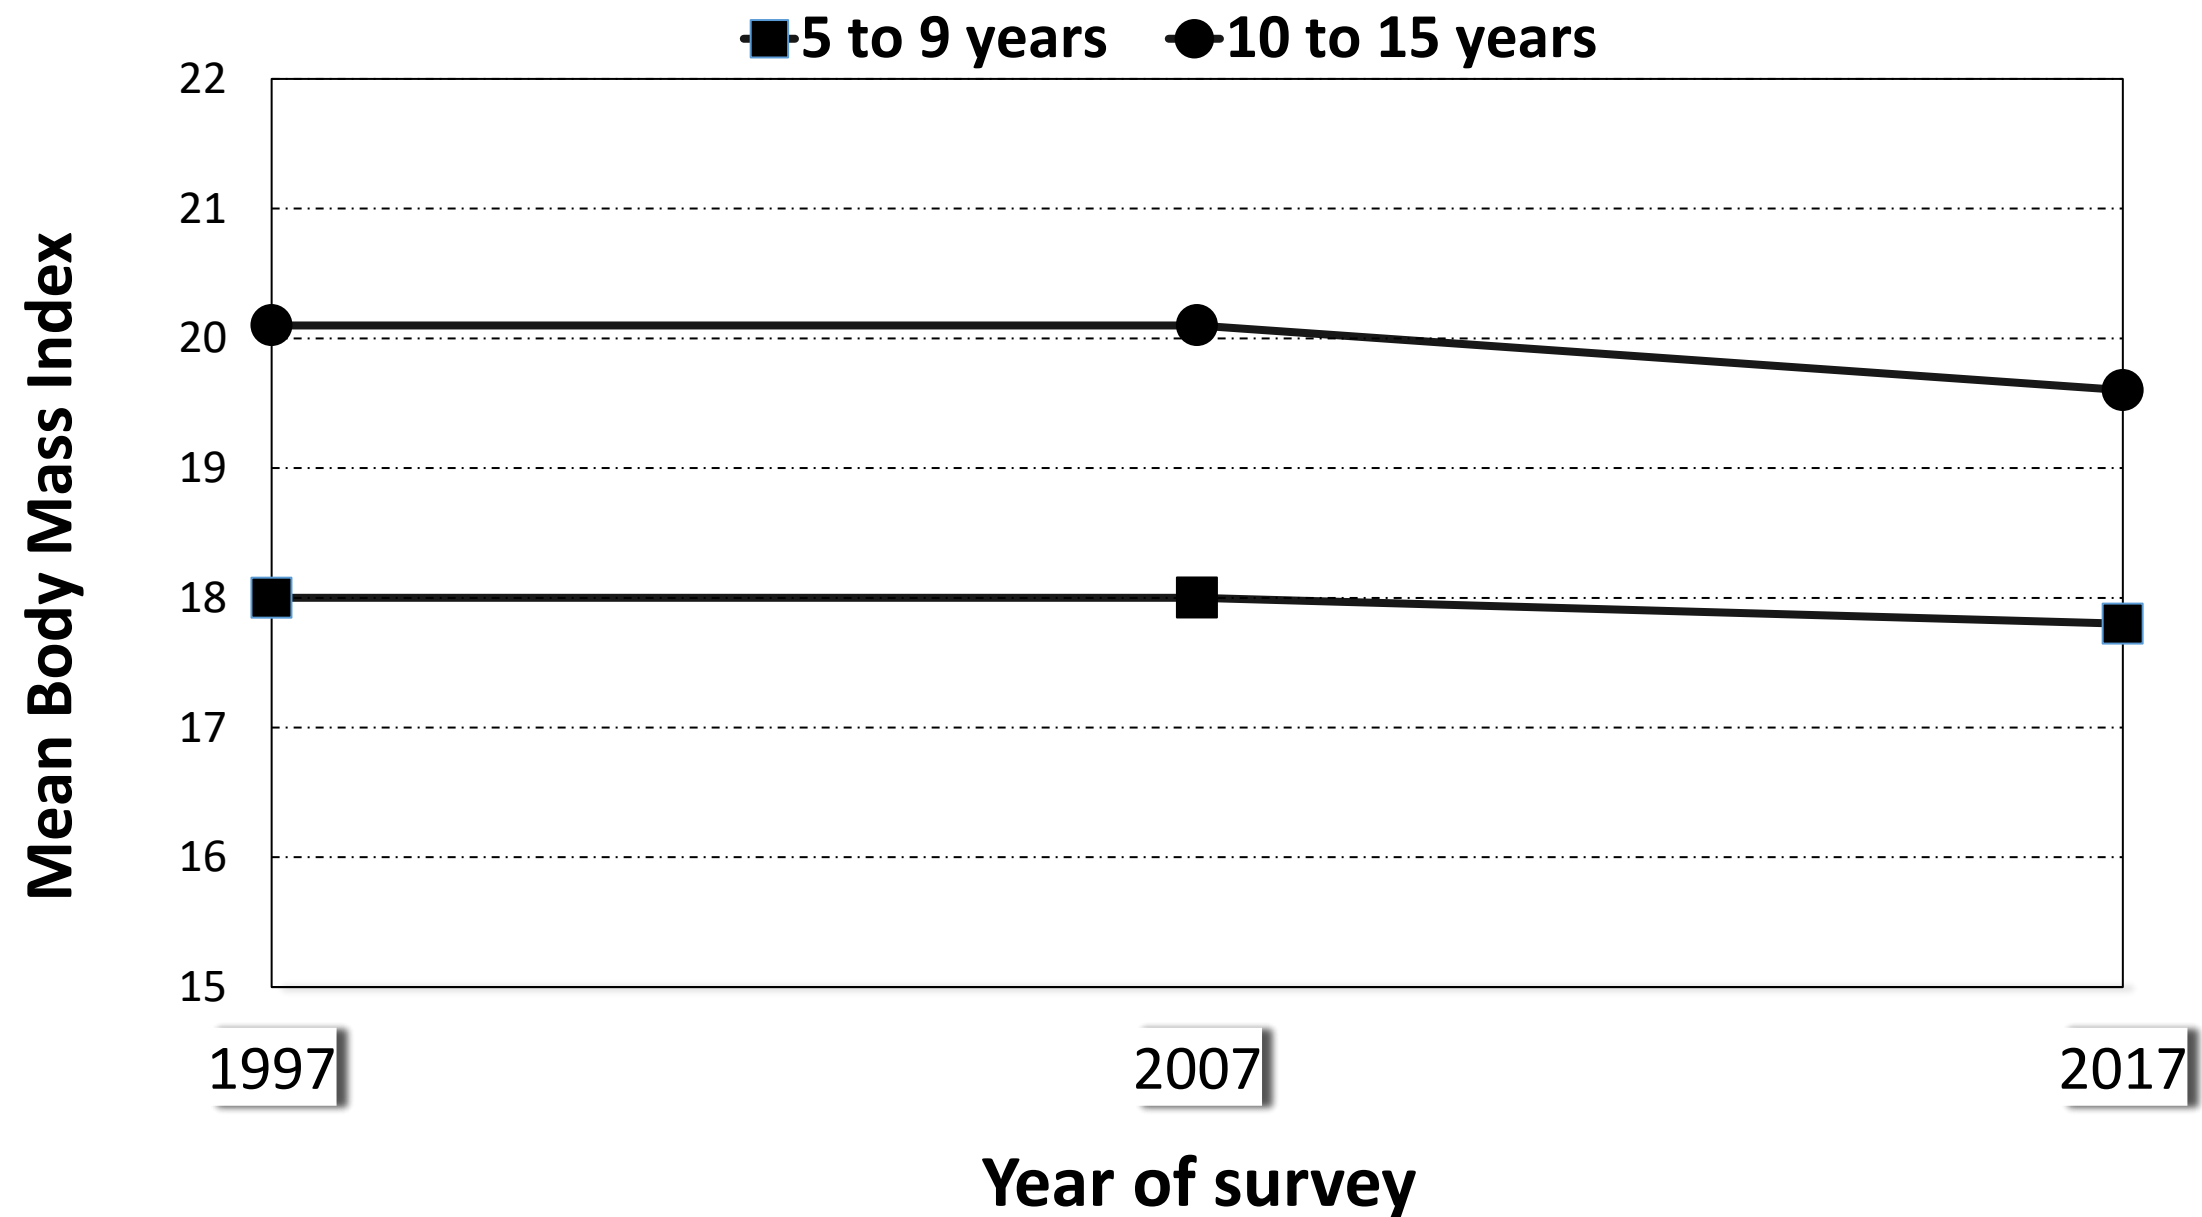

**Figure S2. Mean body mass index in girls aged 5 to 9 and 10 to 15 years**

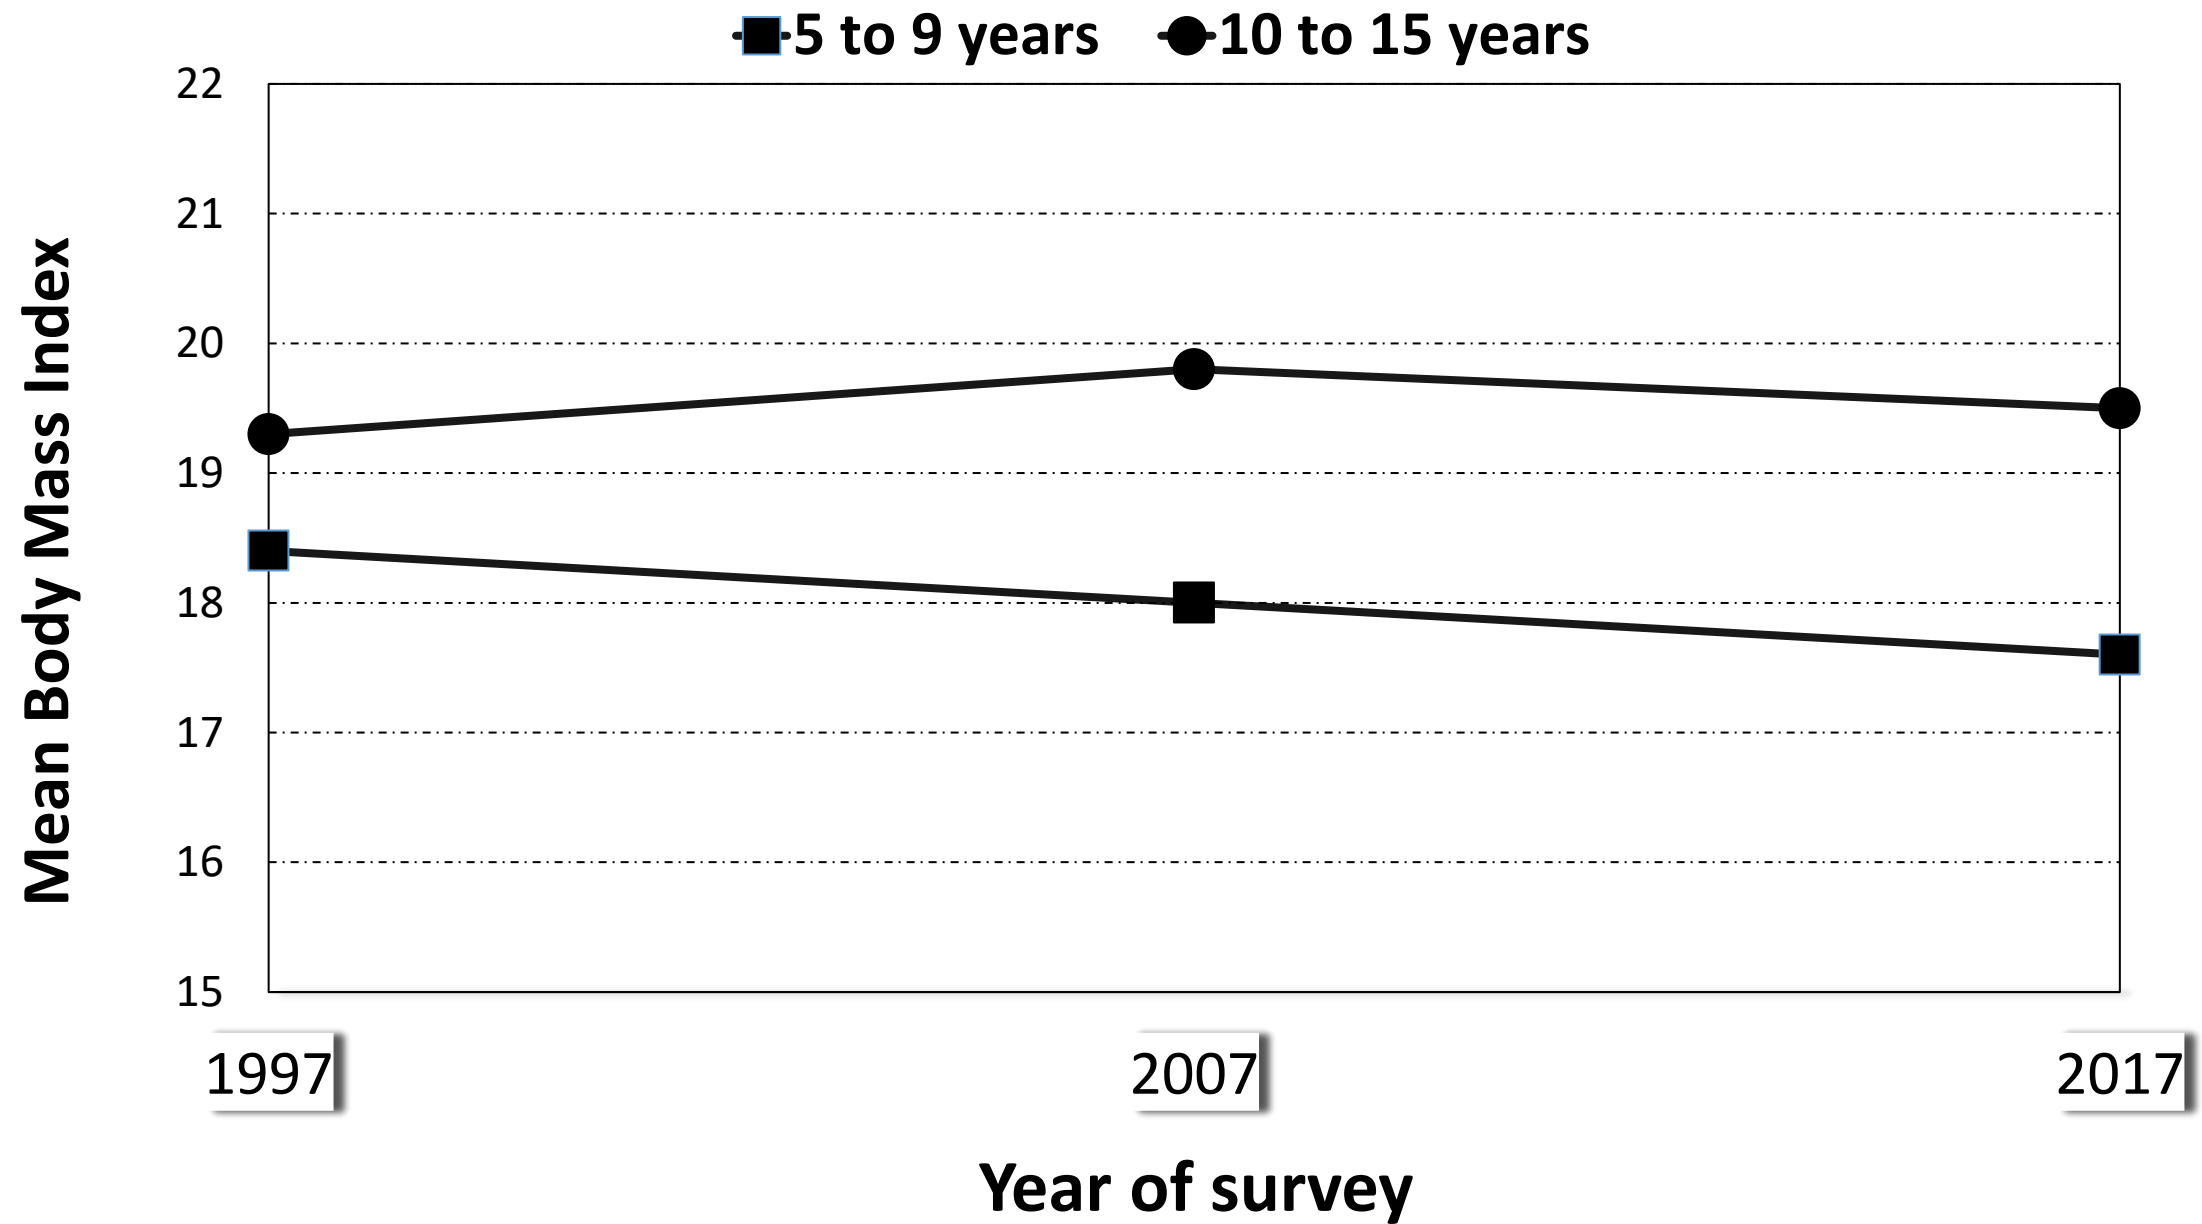

Supplement: s1 [file s1]
